# Supplementary material for: Addressing Barriers to HIV Point-of-Care Testing in Community Pharmacies
Source: MDPI journal article supplement (doi:10.3390/pharmacy9020084), 2021-04-16
Supplement: s1 [file s1]

How comfortable do you feel providing HIV POC testing services to high-risk populations?

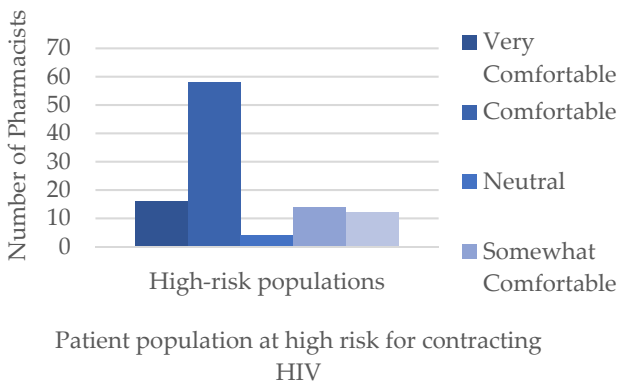

(a)

What percentage of the following high-risk populations fill medications at your community pharmacy?

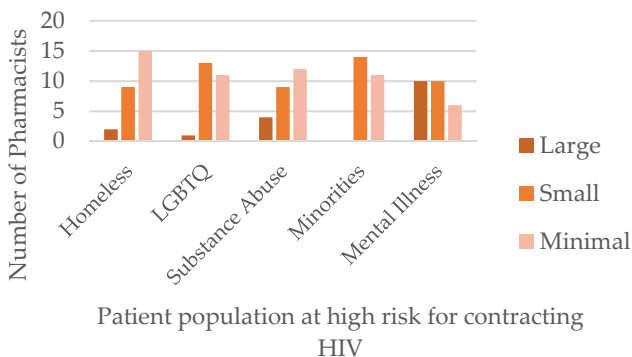

(b)
