# Supplementary figures and images for: Addressing Barriers to HIV Point-of-Care Testing in Community Pharmacies
Source: MDPI journal article supplement (doi:10.3390/pharmacy9020084), 2021-04-16

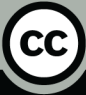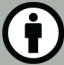

BY

Supplement: s1 [file s1]

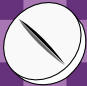

*pharmacy*

Supplement: s1 [file s1]

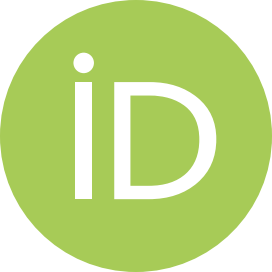

Supplement: s1 [file s1]
